# Supplementary material for: Can health nurses’ assessments of weight status in the first year of life predict well-being in the first years of school?
Source: Research Square preprint supplement (doi:10.21203/rs.3.rs-7194320/v1), 2025-08-18
Supplement: Supplementary file 1 [file 05f4b30ed9b150d0b0818e3f.xlsx]

## Sheet: Sheet1
	Table S1 – Proportion and odds ratio for health and well-being in first years of school by weight status in first year of life (8–10 months)
			%	OR (95%CI)
	Language skills
		Severe thinness	16.24	1.82 (1.08-2.91)
		Thinness	11.66	1.24 (1.04-1.47)
		Normal weight	9.62	1
		Risk of overweight	9.74	1.01 (0.94-1.09)
		Overweight	10.73	1.13 (0.99-1.29)
		Obesity	13.55	1.47 (1.05-2.02)
	Motor development
		Severe thinness	12.41	1.42 (0.84-2.26)
		Thinness	9.48	1.17 (0.98-1.40)
		Normal weight	8.18	1
		Risk of overweight	8.31	1.02 (0.95-1.09)
		Overweight	9.81	1.22 (1.07-1.39)
		Obesity	10.38	1.28 (0.91-1.80)
	Perceived general well-being
		Severe thinness	4.72	0.91 (0.36-1.90)
		Thinness	5.54	1.08 (0.85-1.35)
		Normal weight	5.15	1
		Risk of overweight	5.47	1.07 (0.97-1.16)
		Overweight	5.87	1.15 (0.97-1.35)
		Obesity	5.67	1.11 (0.68-1.69)
	Perceived school well-being
		Severe thinness	14.17	1.44 (0.83-2.26)
		Thinness	11.43	1.13 (0.95-1.32)
		Normal weight	10.49	1
		Risk of overweight	11.09	1.06 (1.00-1.14)
		Overweight	12.73	1.25 (1.10-1.40)
		Obesity	12.18	1.17 (0.85-1.61)
	Parent-child relation
		Severe thinness	4.24	0.91 (0.32-2.01)
		Thinness	4.55	0.98 (0.74-1.26)
		Normal weight	4.64	1
		Risk of overweight	4.88	1.05 (0.96-1.16)
		Overweight	4.63	0.97 (0.82-1.21)
		Obesity	4.05	0.87 (0.47-1.45)
	Health nurses’ observations
		Severe thinness	13.22	0.94 (0.54-1.54)
		Thinness	14.53	1.05 (0.90-1.22)
		Normal weight	13.95	1
		Risk of overweight	13.84	0.99 (0.93-1.05)
		Overweight	15.65	1.14 (1.02-1.28)
		Obesity	13.82	0.99 (0.72-1.33)
	Peer relationship problems
		Severe thinness	7.56	1.07 (0.50-1.99)
		Thinness	7.98	1.13 (0.92-1.38)
		Normal weight	7.11	1
		Risk of overweight	7.39	1.04 (0.96-1.13)
		Overweight	8.97	1.29 (1.11-1.48)
		Obesity	5.94	0.83 (0.50-1.27)
