# Supplementary material for: Can health nurses’ assessments of weight status in the first year of life predict well-being in the first years of school?
Source: Research Square preprint supplement (doi:10.21203/rs.3.rs-7194320/v1), 2025-08-18
Supplement: Supplementary file 1 [file b51dcb4a2b26f6c132090020.pdf]

## Supplementary

**Table S2** – Performance of line regression using restricted cubic splines measured in Area Under the Curve (AUC) by stratification of sex and education level

|                              | Stratification of sex |       | Stratification of education level |                             |
|------------------------------|-----------------------|-------|-----------------------------------|-----------------------------|
|                              | Boy                   | Girl  | Low education <sup>1</sup>        | High education <sup>2</sup> |
| Language skills              | 0.512                 | 0.519 | 0.511                             | 0.512                       |
| Motor development            | 0.517                 | 0.515 | 0.515                             | 0.520                       |
| Perceived general well-being | 0.518                 | 0.510 | 0.507                             | 0.515                       |
| Perceived school well-being  | 0.513                 | 0.517 | 0.516                             | 0.511                       |
| Parent-child relationship    | 0.509                 | 0.515 | 0.516                             | 0.517                       |
| Health nurses' observations  | 0.509                 | 0.509 | 0.509                             | 0.509                       |
| Peer relationships problems  | 0.514                 | 0.509 | 0.515                             | 0.518                       |

<sup>1</sup> Primary and lower secondary education, vocational education and training, general or vocational upper secondary education

<sup>2</sup> 3 years or more at university
